# Supplementary material for: Oral therapy with colonization factor antigen I prevents development of type 1 diabetes in Non-obese Diabetic mice
Source: Sci Rep. 2020 Apr 9;10:6156. doi: 10.1038/s41598-020-62881-4 (PMC7145799; doi:10.1038/s41598-020-62881-4)
Supplement: Supplementary file 1 — Supplementary Tables 1-2 & Supplementary Figures 1-5. [file 41598_2020_62881_MOESM1_ESM.pdf]

Oral therapy with colonization factor antigen I prevents development of type 1 diabetes in Non-obese Diabetic mice

Andrew S. Nelson<sup>1</sup>, Department of Infectious Diseases & Immunology, University of Florida,  
[asnelson6034@ufl.edu](mailto:asnelson6034@ufl.edu)

Massimo Maddaloni<sup>1</sup>, Department of Infectious Diseases & Immunology, University of Florida,  
[maddalonim@ufl.edu](mailto:maddalonim@ufl.edu)

Jeffrey R. Abbott<sup>2</sup>, Department of Comparative, Diagnostic & Population Medicine, University of Florida,  
[abbottj@ufl.edu](mailto:abbottj@ufl.edu)

Carol Hoffman<sup>1</sup>, Department of Infectious Diseases & Immunology, University of Florida,  
[riccardic@ufl.edu](mailto:riccardic@ufl.edu)

Ali Akgul<sup>1</sup>, Department of Infectious Diseases & Immunology, University of Florida,  
[aliakgul@ufl.edu](mailto:aliakgul@ufl.edu)

Christina Ohland<sup>3</sup>, Division of Gastroenterology, Hepatology, and Nutrition, Department of Medicine, University of Florida, [Christina.Ohland@medicine.ufl.edu](mailto:Christina.Ohland@medicine.ufl.edu)

Raad Z. Gharaibeh, Division of Gastroenterology, Hepatology, and Nutrition, Department of Medicine, University of Florida, [raad.gharaibeh@medicine.ufl.edu](mailto:raad.gharaibeh@medicine.ufl.edu)

Christian Jobin<sup>1,3</sup>, Department of Infectious Diseases & Immunology; Division of Gastroenterology, Hepatology, and Nutrition, Department of Medicine, University of Florida,  
[Christian.Jobin@ufl.edu](mailto:Christian.Jobin@ufl.edu)

Todd M. Brusko<sup>4</sup>, Department of Pathology, Immunology, & Laboratory Medicine, University of Florida Diabetes Institute, [tbrusko@ufl.edu](mailto:tbrusko@ufl.edu)

David W. Pascual<sup>1\*</sup>, Department of Infectious Diseases & Immunology, University of Florida,  
[pascuald@ufl.edu](mailto:pascuald@ufl.edu)

**\*Correspondence:** Address inquiries and requests to D.W.P. (email: [pascuald@ufl.edu](mailto:pascuald@ufl.edu))

<sup>1</sup>Department of Infectious Diseases and Immunology, University of Florida, Gainesville, FL, United States

<sup>2</sup>Department of Comparative, Diagnostic, and Population Medicine, University of Florida, Gainesville, FL, United States

<sup>3</sup>Division of Gastroenterology, Hepatology, and Nutrition, Department of Medicine, University of Florida, Gainesville, FL, United States

<sup>4</sup>Department of Pathology, Immunology, & Laboratory Medicine, University of Florida Diabetes Institute, University of Florida, Gainesville, FL, United States

**Supplemental Table 1.** Antibodies used for Flow Cytometry in LL-CFA/I Treg Studies.

| Antibody specificity | Clone        | Source      | Dilution |
|----------------------|--------------|-------------|----------|
| CD19                 | EBio1D3      | eBioscience | 1/600    |
| CD25                 | PC61.5       | Biolegend   | 1/500    |
| CD39                 | 24DMS1       | eBioscience | 1/500    |
| CD4                  | RM4-5        | Biolegend   | 1/500    |
| CD49B                | HMa2         | BD          | 1/400    |
| CD8 $\alpha$         | 53-6.7       | eBioscience | 1/500    |
| CTLA-4               | UC10-4F10-11 | BD          | 1/500    |
| Foxp3                | FJK-16s      | eBioscience | 1/250    |
| IFN- $\gamma$        | XMG1.2       | BD          | 1/250    |
| IL-10                | JES5-16E3    | eBioscience | 1/250    |
| Lag-3                | C9B7W        | Biolegend   | 1/400    |
| PD-1                 | RMPI-30      | eBioscience | 1/500    |
| Tbet                 | 4B10         | Biolegend   | 1/250    |
| TCR- $\beta$         | H57-597      | Biolegend   | 1/500    |
| TGF- $\beta$ (Lap)   | TW7-16B4     | Biolegend   | 1/400    |
| TIGIT                | 1G9          | Biolegend   | 1/400    |
| TNF- $\alpha$        | MP6-XT22     | Biolegend   | 1/250    |

Summary of specificity, clone, and source of antibodies used in flow cytometry analysis.

**Supplemental Table 2.** Primer sequences for detection of cytokine-specific mRNA.

| Gene Name     | Primer | Size | Sequence (5'-3')        |
|---------------|--------|------|-------------------------|
| IL-6          | F      | 23   | TAGTCCTTCCTACCCCAATTTCC |
|               | R      | 21   | TTGGTCCTTAGCCACTCCTTC   |
| TNF- $\alpha$ | F      | 23   | CCCTCAGACTCAGATCATCTTCT |
|               | R      | 19   | GCTACGACGTGGGCTACAG     |
| IL-10         | F      | 21   | GCTCTTACTGACTGGCATGAG   |
|               | R      | 20   | CGCAGCTCTAGGAGCATGTG    |
| IL-33         | F      | 21   | ACAGATATATGACTTACGGCG   |
|               | R      | 23   | AAATGGACCCTCTCTAAAGCAAA |
| GAPDH         | F      | 20   | ACCACAGTCCATGCCATCAC    |
|               | R      | 19   | TCCACCACCCTGTTGCTGTA    |
| B-actin       | F      | 22   | ATCTACGAGGGCTATGCTCTCC  |
|               | R      | 21   | AGCCTCGGTCAGGATCTTCAT   |

### Supplemental Figure 1. Negative Controls for Tetramer Staining

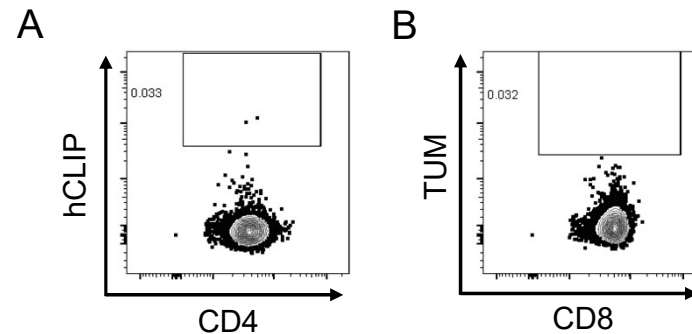

Supplemental Figure 1. Negative controls for tetramer staining. Four wk-old NOD females were orally dosed with  $5 \times 10^7$  CFUs of LL-CFA/I, LL vector, or PBS (n=5/group). Additional doses were given every 2 wks. At 11 wks of age, lymphocytes from the PaLNs were isolated and labeled with tetramers specific for (A) human CLIP or (B) TUM peptide.

**Supplemental Figure 2. LL-CFA/I does not Induce Negative Regulators in NOD Mice**

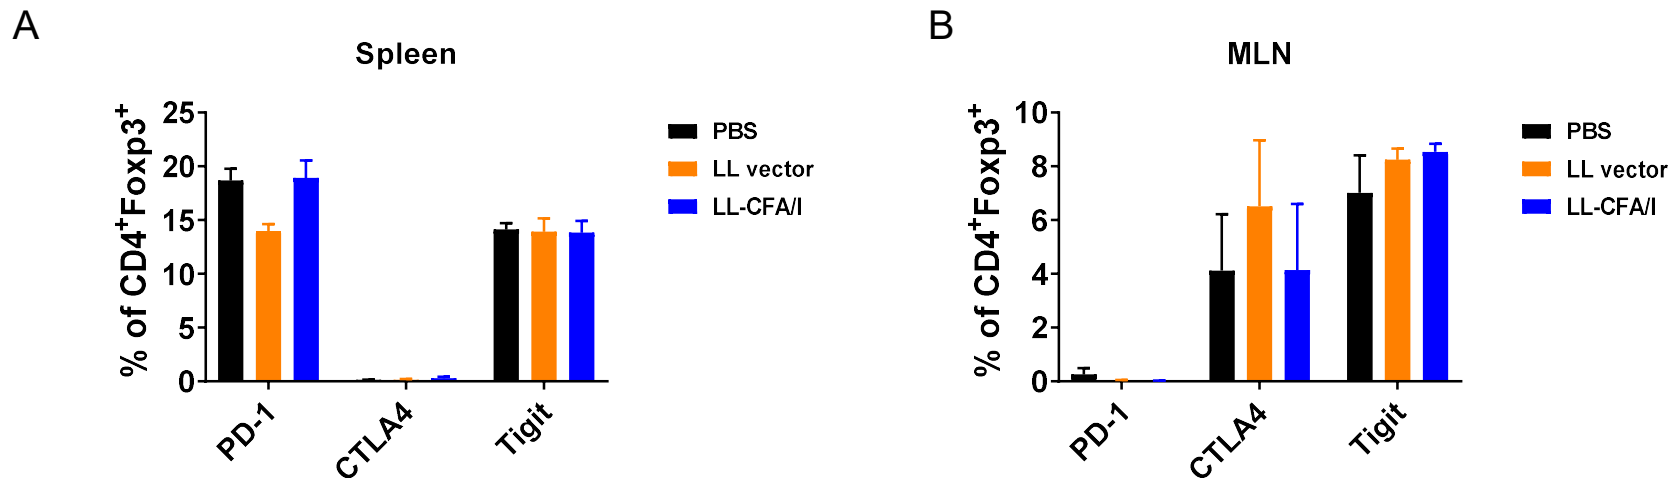

Supplemental Figure 2. LL-CFA/I does not induce negative regulators in NOD mice. Four wk-old NOD females were orally dosed with  $5 \times 10^7$  CFUs of LL-CFA/I, LL vector, or PBS (n=5/group). Additional doses were given every 2 wks. At 11 wks of age, Foxp3<sup>+</sup>CD4<sup>+</sup> Tregs from the (A) spleens and (B) MLNs were examined for expression of PD-1, CTLA-4 and Tigit.

**Supplemental Figure 3. LL-CFA/I promotes regulatory environment in the gut.**

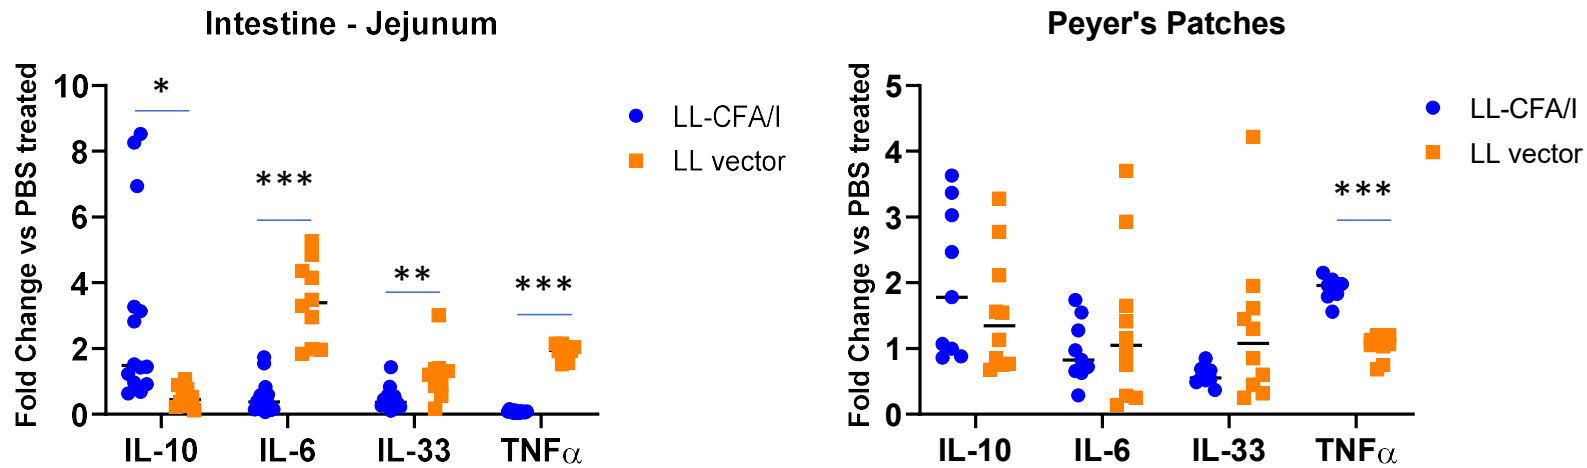

Supplemental Figure 3. LL-CFA/I promotes regulatory environment in the gut. Eight week old BALB/c mice (n=9-14/group) were orally dosed with  $2 \times 10^9$  CFUs of LL-CFA/I, LL-vector or PBS. After 1.5 hours, small intestines and Peyer's Patches were collected. Expression of cytokines was analyzed as fold change against the PBS control group. \* $p < 0.05$ , \*\* $p < 0.005$ , and \*\*\* $p < 0.0001$  for LL-CFA/I vs LL-vector.

**Supplemental Figure 4.** Mouse Microbiota are not Significantly Different Between Groups Before LL Treatments Begin.

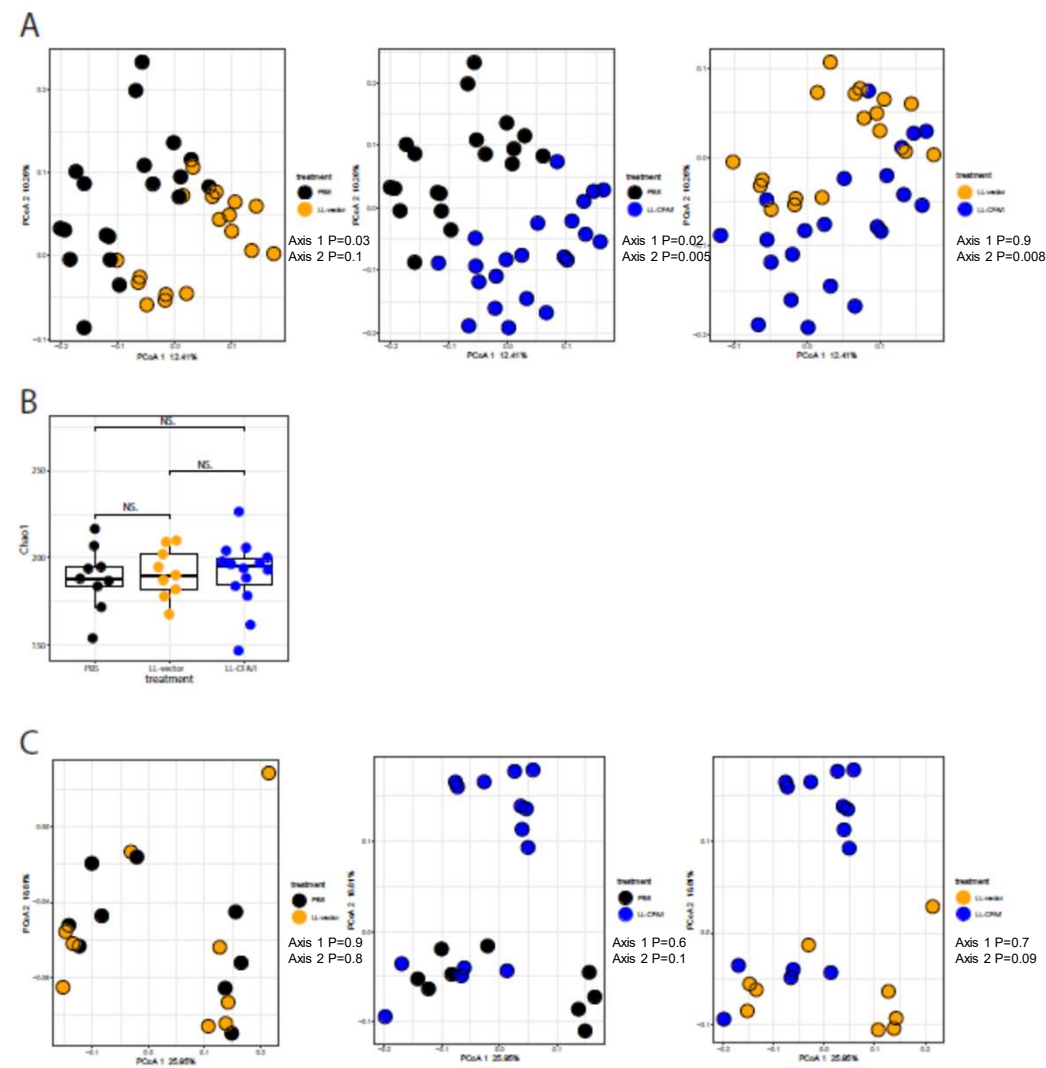

Supplemental Figure 4. Mouse microbiota are not significantly different between groups before LL treatments begin. (A) Pair-wise comparisons of beta diversity post-treatment (11 weeks old). (B) Alpha diversity of pre-treatment samples at 4 weeks old. (C) PCoA plots of beta diversity in pre-treatment samples. NS, not significant.

**Supplemental Figure 5.** LL-CFA/I does not Induce Splenic IFN- $\gamma$ <sup>+</sup>IL-10<sup>+</sup> Foxp3<sup>+</sup>CD4<sup>+</sup> Tr1 cells at 17 weeks

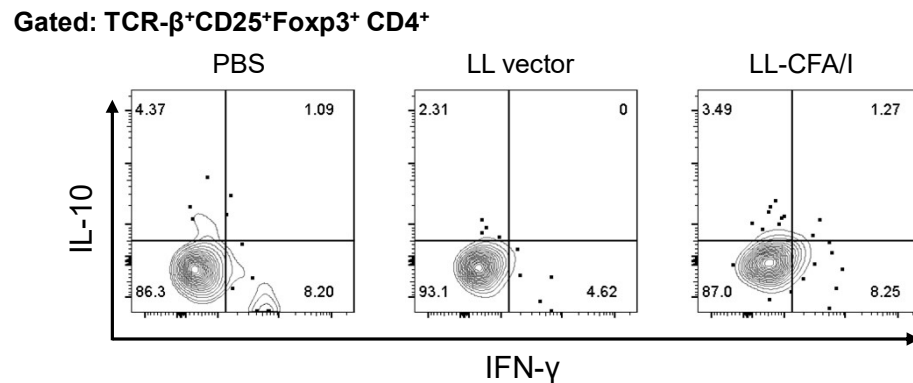

Supplemental Figure 5. LL-CFA/I does not Induce Splenic IFN- $\gamma$ <sup>+</sup>IL-10<sup>+</sup> Foxp3<sup>+</sup>CD4<sup>+</sup> Tr1 cells at 17 weeks. Four wk-old NOD females were orally dosed with  $5 \times 10^7$  CFUs of LL-CFA/I, LL vector, or PBS (n=5/group). Additional doses were given every 2 wks from 6 to 16 weeks of age. (A) Splenocytes were stimulated with anti-CD3 and anti-CD28 mAbs and CD25<sup>+</sup>Foxp3<sup>+</sup>CD4<sup>+</sup>Tregs analyzed for expression of IFN- $\gamma$  and IL-10.
